# Supplementary material for: Intestinal region-specific Wnt signalling profiles reveal interrelation between cell identity and oncogenic pathway activity in cancer development
Source: Cancer Cell Int. 2020 Dec 3;20:578. doi: 10.1186/s12935-020-01661-6 (PMC7713000; doi:10.1186/s12935-020-01661-6)
Supplement: Supplementary file 2 — Additional file 2. Location signatures are downregulated upon Wnt activation. Genes depicted in Fig. 2A are provided in a table format with compiled log2 fold changes (l2FC) (n = 3) for each location separately. The comparison of the wt samples of prSI, diSI or colon to all other locations’ wt samples retrieved the most significantly (Wald-Test) upregulated genes categorized as internal location (int. loc.) marker genes. Corresponding log2 fold changes are listed under l2FC.loc for all locations. External location (ext. loc.) marker genes were previously reported to be specific to intestinal divisions [20, 33] or specifically enriched in the intestine based on the Human Protein Atlas [34–37]. Cell type marker genes were previously reported to be specific to differentiated intestinal cells [38–40]. The downregulation of location and differentiation markers upon Wnt activation can be appreciated in the separately calculated log2 fold changes (Cβ/wt) listed under l2FC.ctn.vs.wt. NA values correspond to expression below detection in either condition or a non-mappable gene symbol from literature. [file 12935_2020_1661_MOESM2_ESM.xls]

## Sheet: Tabelle1
symbol	assigned.loc	int.loc.	ext.loc.	ProteinAtlas	cell.type	l2FC.loc.wt.prSI.vs.others	l2FC.loc.wt.diSI.vs.others	l2FC.loc.wt.colon.vs.others	l2FC.ctn.vs.wt.prSI	l2FC.ctn.vs.wt.diSI	l2FC.ctn.vs.wt.colon
Nkx6-3	prSI	prSI (padj. 3.32e-59)	NA	NA	NA	7.45571	-7.37515	-5.89553	-0.137814	-1.08564	0.202958
Ugt1a9	prSI	prSI (padj. 9.41e-40)	NA	NA	NA	7.23216	-5.45864	-8.6753	-2.76675	-0.109861	NA
Slc16a12	prSI	prSI (padj. 4.96e-34)	NA	NA	NA	4.1906	-2.88915	-3.78313	0.187206	-1.16707	1.49819
Defa27	prSI	prSI (padj. 1.68e-30)	NA	NA	NA	8.19477	-6.26109	-10.0602	-1.32466	-0.786748	NA
Ndufb8	prSI	prSI (padj. 9.73e-29)	NA	NA	NA	1.14948	-0.583997	-0.792159	-0.477651	-0.00808778	-0.0243015
Gas1	prSI	prSI (padj. 2.59e-23)	NA	NA	NA	7.40359	-8.05714	-5.38855	-0.308863	NA	-3.57275
Akp3	prSI	prSI (padj. 7.21e-23)	NA	NA	NA	10.3347	-8.44346	-12.5597	-0.36208	-2.2543	-1.81921
Sptssb	prSI	prSI (padj. 7.64e-22)	NA	NA	NA	4.12485	-3.16068	-3.2482	-0.57527	1.21074	0.707805
Zdhhc6	prSI	prSI (padj. 1.81e-20)	NA	NA	NA	1.24549	-0.608649	-0.908364	0.227544	0.465999	0.48854
Gstm2	prSI	prSI (padj. 6.10e-20)	NA	NA	NA	1.8493	-1.30225	-1.10293	0.113892	-0.0434682	-0.345796
Reg1	prSI	prSI (padj. 2.87e-18)	NA	NA	NA	11.006	-9.0479	-14.6295	-4.52315	-0.808122	0.518227
Adh5	prSI	prSI (padj. 9.21e-17)	NA	NA	NA	1.16858	-0.50928	-0.905595	-0.126925	0.166416	0.389309
Fth1	prSI	prSI (padj. 2.27e-16)	A-B: Duod./Jejun.	NA	NA	2.25548	-1.35486	-1.72122	-1.24507	-0.851089	-1.02357
Adh1	prSI	prSI (padj. 2.52e-16)	NA	NA	NA	3.76981	-2.86797	-2.87569	-1.28626	-4.3124	-0.63387
Fam204a	prSI	prSI (padj. 3.42e-15)	NA	NA	NA	1.44487	-0.825557	-0.968105	-0.327807	0.0758576	0.0233301
AI427809	diSI	diSI (padj. 3.04e-48)	NA	NA	NA	-6.74528	8.16774	-7.52214	-0.243718	-2.03494	-0.149299
Osr2	diSI	diSI (padj. 3.21e-36)	NA	NA	NA	-11.1308	11.6339	-10.4023	NA	-0.512677	NA
Bcl2l15	diSI	diSI (padj. 4.86e-34)	NA	NA	NA	-3.71176	4.84379	-4.11069	-2.50855	-1.52576	-1.01369
Tmem117	diSI	diSI (padj. 4.02e-32)	NA	NA	NA	-4.07175	5.02506	-4.03569	0.00372946	-2.14865	0.691019
Defa20	diSI	diSI (padj. 2.70e-27)	NA	NA	NA	-26.8123	12.8162	-10.7956	NA	-2.12895	-1.06902
Slc7a2	diSI	diSI (padj. 4.97e-27)	NA	NA	NA	-4.9465	6.31225	-6.03079	-1.40524	-1.7003	-0.0392055
Tfpi2	diSI	diSI (padj. 1.47e-25)	NA	NA	NA	-5.12703	6.89439	-9.03262	-2.0368	-3.14833	NA
Defa32	diSI	diSI (padj. 7.48e-25)	NA	NA	NA	-26.0089	12.4738	-11.1772	NA	-2.17816	0.516743
Matn2	diSI	diSI (padj. 1.14e-23)	NA	NA	NA	-4.02691	4.90064	-3.89811	0.622714	-1.78776	0.532047
Defa21	diSI	diSI (padj. 1.82e-22)	NA	NA	NA	-10.3798	11.8538	-25.5195	-0.947758	-2.04766	1.37475
Cxxc4	diSI	diSI (padj. 5.29e-22)	NA	NA	NA	-3.04414	4.11638	-3.37664	-0.492778	-0.178376	-0.341016
Fabp6	diSI	diSI (padj. 2.04e-19)	BC-C: Jejun./Ileum	protAtlas	NA	-9.74258	8.44012	-6.45671	0.602066	-3.87561	-0.999933
Rassf4	diSI	diSI (padj. 2.30e-19)	NA	NA	NA	-5.12969	5.05398	-3.4569	1.19623	-1.16949	-1.93526
Acer1	diSI	diSI (padj. 2.18e-18)	NA	NA	NA	-3.41247	4.54515	-3.84569	-2.63531	-2.55713	-2.24758
Gabre	diSI	diSI (padj. 1.02e-17)	NA	NA	NA	-3.71947	5.16848	-4.88185	1.50222	-0.739303	2.84506
St6galnac6	colon	colon (padj. 3.04e-122)	NA	NA	NA	-8.43174	-8.72242	9.57228	0.541848	-0.139363	-0.821787
Rab11fip5	colon	colon (padj. 5.41e-118)	NA	NA	NA	-8.34728	-8.61807	9.45928	0.245697	-1.04967	-0.785168
Prnp	colon	colon (padj. 1.09e-114)	NA	NA	NA	-4.06548	-3.99203	4.99094	0.584313	0.446092	-1.28761
Muc1	colon	colon (padj. 4.30e-106)	NA	NA	NA	-9.44564	-10.3176	10.8184	1.02202	-1.65876	-1.3449
Unc13d	colon	colon (padj. 1.66e-100)	NA	NA	NA	-4.40113	-3.88301	5.09311	1.46712	1.396	-0.523712
Tmem43	colon	colon (padj. 1.13e-96)	NA	NA	NA	-1.44306	-1.29188	2.05536	0.967577	0.78948	-0.114421
Cers3	colon	colon (padj. 2.18e-93)	NA	NA	NA	-7.66678	-7.39373	8.59219	1.14382	1.04305	-1.10662
S100a14	colon	colon (padj. 1.91e-92)	NA	NA	NA	-3.40314	-3.74622	4.5035	1.03748	0.73222	-0.474744
B3galt5	colon	colon (padj. 1.35e-87)	NA	NA	NA	-6.68582	-6.91006	7.78717	0.360585	-0.695317	-1.1782
Tnip3	colon	colon (padj. 1.34e-85)	NA	NA	NA	-7.91455	-7.80593	8.87855	0.954945	1.16716	-0.437124
S100a11	colon	colon (padj. 8.30e-85)	NA	NA	NA	-1.95012	-1.86239	2.70048	0.650933	1.32221	-0.0311357
Fam129b	colon	colon (padj. 9.32e-81)	NA	NA	NA	-1.66578	-1.47601	2.30234	0.467327	0.345441	-0.375793
Abtb2	colon	colon (padj. 4.96e-76)	NA	NA	NA	-3.51134	-3.59979	4.49033	-0.611401	-0.490969	-0.849417
S100a16	colon	colon (padj. 1.31e-75)	NA	NA	NA	-2.58143	-2.98619	3.66227	-0.158749	-0.284211	-0.320387
Cdh13	colon	colon (padj. 3.24e-71)	NA	NA	NA	-10.5516	-7.0582	9.02831	NA	4.42004	-0.864854
Slc1a3	prSI	NA	A-B: Duod./Jejun.	NA	NA	2.10445	-0.149391	-4.88449	-1.5911	-4.57757	NA
Slc40a1	prSI	NA	A-B: Duod./Jejun.	NA	NA	1.50025	-3.14736	0.174792	-0.739647	-0.94064	-1.86046
Cybrd1	prSI	NA	A-B: Duod./Jejun.	NA	NA	-3.78592	3.54274	-1.98051	0.259968	0.724132	0.174462
Slc2a2	prSI	NA	A-B: Duod./Jejun.	NA	NA	1.76212	0.236116	-10.578	-2.23101	-4.28291	2.03666
Slc5a10	prSI	NA	A-B: Duod./Jejun.	NA	NA	-1.8107	-1.04577	2.13637	0.853707	0.688861	-1.26674
Treh	prSI	NA	A-B: Duod./Jejun.	NA	NA	0.993166	0.768658	-3.54491	-2.45635	-3.92264	-3.70648
Pdx1	prSI	NA	A-B: Duod./Jejun.	NA	NA	5.48098	-6.63773	-3.65505	-0.523282	-1.57222	-0.367635
Alpi	prSI	NA	A-B: Duod./Jejun.	protAtlas	Enterocytes	4.37535	-2.85152	-4.40209	-0.903474	-2.7551	-3.65456
Fabp1	prSI	NA	A-B: Duod./Jejun.	NA	Enterocytes	2.64172	-0.64167	-13.9924	-4.02821	-6.31743	NA
Cck	prSI	NA	A-B: Duod./Jejun.	NA	Enteroendocrine	-1.23072	3.16377	-6.44469	-1.74209	-0.896908	1.09551
Slc2a5	prSI	NA	A-B: Duod./Jejun.	NA	NA	1.56659	0.418622	-7.77062	-2.58956	-3.43328	0.0947874
Gata4	prSI	NA	A-B: Duod./Jejun.	NA	NA	2.45931	-0.462998	-10.1023	-0.308764	-0.977193	-1.38619
Lct	prSI	NA	A-B: Duod./Jejun.	protAtlas	Enterocytes	-4.71833	6.701	-10.0001	-3.38562	-5.79677	2.62478
Gata6	prSI	NA	A-B: Duod./Jejun.	NA	NA	0.0700914	0.354424	-0.466553	-0.594343	-0.262299	0.092678
Slc9a3	prSI	NA	A-B: Duod./Jejun.	NA	NA	0.263671	1.47371	-3.48545	1.1194	-4.34059	-3.62954
Slc5a11	prSI	NA	A-B: Duod./Jejun.	NA	NA	0.538685	1.44501	-7.87302	-4.32085	-5.00005	NA
Gata5	diSI	NA	BC-C: Jejun./Ileum	NA	NA	0.492579	1.29718	-3.76691	0.193373	0.575628	-1.68168
Slc30a2	diSI	NA	BC-C: Jejun./Ileum	NA	NA	-2.95155	4.77052	-6.12195	-0.78761	-2.72711	-4.05339
Slc13a2	diSI	NA	BC-C: Jejun./Ileum	NA	NA	-1.59984	1.76444	-0.750961	-3.57444	-3.9361	-3.5299
Fabp2	diSI	NA	BC-C: Jejun./Ileum	NA	NA	1.91106	0.0728254	-7.64403	-2.6439	-2.23028	-0.755559
Cdx2	diSI	NA	BC-C: Jejun./Ileum	NA	NA	-0.0306198	0.562551	-0.61161	-0.0212925	-0.154796	-1.34091
Slc44a1	diSI	NA	BC-C: Jejun./Ileum	NA	NA	-0.898705	-0.151206	0.87356	0.0755753	-0.363071	-0.188643
Slc02b1	diSI	NA	BC-C: Jejun./Ileum	NA	NA	NA	NA	NA	NA	NA	NA
Abcb1a	diSI	NA	BC-C: Jejun./Ileum	NA	NA	-0.710351	-0.0551697	0.658263	-0.60338	-0.381919	-1.14599
Reg3g	diSI	NA	BC-C: Jejun./Ileum	NA	NA	0.0597236	1.88508	-5.85637	-1.72875	-2.05333	-5.1117
Slc10a2	diSI	NA	BC-C: Jejun./Ileum	NA	NA	-6.37205	-1.24284	3.18313	0.782623	-0.609676	-0.870722
Slc51a	diSI	NA	BC-C: Jejun./Ileum	NA	NA	-0.805314	2.74722	-6.19198	-1.98234	-3.09578	-2.81813
Slc51b	diSI	NA	BC-C: Jejun./Ileum	NA	NA	-2.90965	2.3481	-0.820125	-3.72137	-3.42026	-2.73394
Sct	diSI	NA	BC-C: Jejun./Ileum	NA	NA	-0.677545	2.47839	-4.38123	-0.932949	-0.551787	0.196443
Pyy	diSI	NA	BC-C: Jejun./Ileum	NA	NA	-5.32876	2.44193	-0.520342	-0.316318	-1.78797	2.84267
Cdx1	diSI	NA	BC-C: Jejun./Ileum	NA	NA	-10.1388	2.35691	-0.360064	-1.33304	-0.266578	0.780591
Isx	diSI	NA	BC-C: Jejun./Ileum	NA	NA	0.943785	-0.739415	-0.367954	-0.269161	0.642374	0.243639
Tff3	diSI	NA	BC-C: Jejun./Ileum	NA	Goblet	0.951219	0.70329	-2.97758	0.264571	0.263449	1.39448
Fermt1	colon	NA	Colon	NA	NA	-0.341757	-0.708389	0.900819	0.29491	0.43673	-0.00243058
Lgals9	colon	NA	Colon	NA	NA	0.452936	0.735109	-1.62715	-0.572204	-0.656806	-1.7194
Nxpe4	colon	NA	Colon	NA	NA	-23.9253	-23.0525	10.8612	NA	NA	0.133102
Il1r2	colon	NA	Colon	NA	NA	NA	NA	NA	NA	NA	NA
Litaf	colon	NA	Colon	NA	NA	-0.983126	-1.3743	1.80867	0.222924	0.391965	-0.25213
Nxpe1-ps	colon	NA	Colon	NA	NA	NA	NA	NA	NA	NA	NA
Slc26a3	colon	NA	Colon	NA	Colonocytes	-1.4275	-1.02209	1.86586	-1.74802	-2.16036	-2.79119
Macir	colon	NA	Colon	NA	NA	NA	NA	NA	NA	NA	NA
Gba	colon	NA	Colon	NA	NA	-0.921897	-0.802347	1.39728	0.071654	0.00183845	-0.764551
Nupr1	colon	NA	Colon	NA	Goblet	-4.04807	-2.3863	3.92144	1.89948	0.494856	-0.690527
Vav3	colon	NA	Colon	NA	NA	-0.530452	2.16067	-3.20258	-0.661811	0.363843	-0.819293
Traf3ip2	colon	NA	Colon	NA	NA	-0.59615	-0.560333	0.990392	-0.270398	-0.0671275	-0.244486
Pigr	colon	NA	Colon	NA	NA	1.06427	-0.230093	-1.09213	-0.631398	-0.397288	-1.57415
Pip4k2c	colon	NA	Colon	NA	NA	-0.372285	-0.535278	0.796888	9.07625268559512e-05	-0.182792	-0.589516
Prdx5	colon	NA	Colon	NA	NA	0.225405	-1.22258	0.737869	-0.46356	-0.477802	-0.934385
Slc39a8	colon	NA	Colon	NA	NA	0.788301	-0.586615	-0.314299	-0.411889	0.473238	0.809075
Glb1	colon	NA	Colon	NA	NA	-1.14042	0.243547	0.671844	0.382149	-0.462674	-0.745287
Cln3	colon	NA	Colon	NA	NA	-1.19424	0.324484	0.631057	1.03184	0.367135	-0.594659
Fcgr2a	colon	NA	Colon	NA	NA	NA	NA	NA	NA	NA	NA
Rnf186	colon	NA	Colon	NA	NA	0.171928	0.50506	-0.787244	1.07369	0.125654	0.109093
Ip6k2	colon	NA	Colon	NA	NA	-0.237132	0.115422	0.112556	0.297964	-0.0635949	0.0961151
Pde4a	colon	NA	Colon	NA	NA	-1.62639	-0.952238	1.94143	2.2573	0.0234039	-1.81878
Rab5b	colon	NA	Colon	NA	NA	-0.523706	-0.330065	0.753118	-0.0160117	-0.295344	-0.482097
Psmd3	colon	NA	Colon	NA	NA	0.168945	-0.0149095	-0.160695	-0.298606	0.192416	0.35613
Mep1b	general	NA	NA	protAtlas	NA	0.326941	0.352727	-0.785413	-0.793528	-1.2887	-1.12081
Tm4sf20	general	NA	NA	protAtlas	NA	0.191806	-0.229599	0.0272674	-0.59788	-1.13276	-1.2059
Sis	general	NA	NA	protAtlas	NA	-0.024875	2.02432	-12.4575	-2.10336	-3.63606	0.258498
Rbp2	general	NA	NA	protAtlas	NA	2.46825	-0.696271	-4.03419	-2.42585	-3.93156	-2.30598
Muc3	general	NA	NA	protAtlas	NA	-1.92156	0.583356	0.740324	-0.153476	-1.60172	-1.10427
Mep1a	general	NA	NA	NA	Enterocytes	-2.36307	1.1938	0.281009	-0.62943	-2.68135	-2.15841
Clec2h	general	NA	NA	NA	Enterocytes	-0.167158	-1.09383	1.01232	-1.93151	-2.04316	-1.41685
Cbr1	general	NA	NA	NA	Enterocytes	0.651226	-1.09209	0.233293	-0.168647	-0.887234	-1.10137
Ephx2	general	NA	NA	NA	Enterocytes	-0.243283	0.405951	-0.191525	-0.112608	-2.46373	-1.81179
Mttp	general	NA	NA	NA	Enterocytes	1.83901	0.0684556	-5.07664	-1.33416	-2.88139	-2.04339
Reg3a	general	NA	NA	NA	Enterocytes	-1.49212	3.492	-12.6914	-5.08818	-5.77937	NA
Apoa4	general	NA	NA	NA	Enterocytes	0.907697	0.981564	-4.67692	-2.67194	-4.18815	-7.93653
Lyz1	general	NA	NA	NA	Paneth	0.497969	1.49793	-9.48391	-2.24637	-0.726578	2.78343
Ephb3	general	NA	NA	NA	Paneth	-0.0872856	-0.0912781	0.17358	0.363412	0.341845	0.104465
Mmp7	general	NA	NA	NA	Paneth	-1.01595	0.0303353	0.79049	-0.238871	0.858171	-1.89681
Defa17	general	NA	NA	NA	Paneth	0.0627214	1.93505	-10.8075	-1.75655	-1.50179	-0.239902
Mptx2	general	NA	NA	NA	Paneth	3.506	-1.50667	-10.8205	-0.620906	0.220127	NA
Defa29	general	NA	NA	NA	Paneth	0.12794	1.87055	-11.2244	-2.00143	-2.89906	NA
Lyz2	general	NA	NA	NA	Paneth	0.835711	1.1481	-6.46335	-1.81364	-0.491	2.5053
Defa22	general	NA	NA	NA	Paneth	-1.61425	3.61154	-11.4502	-1.75071	-2.2202	NA
Fzd5	general	NA	NA	NA	Paneth	0.0794783	0.173366	-0.266121	-0.905475	-0.903095	0.0783743
Ephb2	general	NA	NA	NA	Paneth	-0.0196791	-0.121244	0.137108	0.196388	0.42346	0.261843
Chga	general	NA	NA	NA	Enteroendocrine	-0.967823	2.74962	-4.26131	-1.40074	-0.937786	2.22411
Reg4	general	NA	NA	NA	Enteroendocrine	1.21755	0.688836	-4.93997	-0.773966	-1.21203	2.38463
Gcg	general	NA	NA	NA	Enteroendocrine	-8.43085	7.77102	-6.00476	-3.38526	-1.46788	2.38639
Sst	general	NA	NA	NA	Enteroendocrine	2.60408	-0.607233	-8.59884	-1.2751	-4.52457	NA
Ghrl	general	NA	NA	NA	Enteroendocrine	1.1283	0.19606	-2.05366	-1.04922	-1.88519	-1.38384
Tac1	general	NA	NA	NA	Enteroendocrine	-3.90645	-2.30009	3.81581	-1.03694	-1.36466	-2.56366
Tph1	general	NA	NA	NA	Enteroendocrine	0.559335	1.27025	-4.12155	-1.15844	-0.464292	2.78123
Nts	general	NA	NA	NA	Enteroendocrine	-5.21486	5.9562	-4.73813	1.44303	-3.17367	-1.92897
Gip	general	NA	NA	NA	Enteroendocrine	1.90813	0.0913108	-10.2552	-2.78951	-2.60066	NA
Agr2	general	NA	NA	NA	Goblet	0.341981	0.0987376	-0.483835	-0.556231	-0.384419	0.719052
Spink4	general	NA	NA	NA	Goblet	1.18114	0.677626	-4.3283	-0.664521	-0.326558	1.10947
Manf	general	NA	NA	NA	Goblet	0.447072	0.0956281	-0.613037	-0.394159	0.00560494	0.300416
Ccl9	general	NA	NA	NA	Goblet	0.242455	1.5637	-3.93045	-0.340683	-0.13065	1.57309
Wfdc2	general	NA	NA	NA	Goblet	-28.325	-11.5329	13.6509	2.6344	0.811931	-1.54587
Itln1	general	NA	NA	NA	Goblet	-0.598477	2.58885	-8.65076	-2.38823	-1.27765	-1.42335
Atp12a	general	NA	NA	NA	Colonocytes	-28.7617	-10.6854	12.7068	NA	-0.723601	-1.63796
Car1	general	NA	NA	NA	Colonocytes	-30	-11.463	13.4661	NA	-0.706131	-1.39538
Krt19	general	NA	NA	NA	Colonocytes	-0.790013	-0.99478	1.4368	-0.295973	-0.190784	-0.208259
Phgr1	general	NA	NA	NA	Colonocytes	0.163482	-0.518675	0.308	-0.213941	-0.833132	-0.685163
Selenbp1	general	NA	NA	NA	Colonocytes	-0.398632	-0.497747	0.789296	0.175047	-1.11378	-1.7272
Ceacam1	general	NA	NA	NA	Colonocytes	-2.71689	-1.46051	2.78916	-0.0788708	0.327993	-0.91938
Aqp8	general	NA	NA	NA	Colonocytes	-9.03947	-8.84084	9.92236	-4.50996	-1.99226	-3.05392
Dclk1	general	NA	NA	NA	Tuft	-2.29664	3.98631	-4.83775	-0.00175748	-1.47884	-1.10844
Cd24a	general	NA	NA	NA	Tuft	-0.144338	0.018221	0.121969	-0.000171306	-0.210027	0.0337665
Lrmp	general	NA	NA	NA	Tuft	-3.58979	-2.15947	3.61133	-0.695369	-0.844115	-2.1676
