# Supplementary material for: Intestinal region-specific Wnt signalling profiles reveal interrelation between cell identity and oncogenic pathway activity in cancer development
Source: Cancer Cell Int. 2020 Dec 3;20:578. doi: 10.1186/s12935-020-01661-6 (PMC7713000; doi:10.1186/s12935-020-01661-6)
Supplement: Supplementary file 5 — Additional file 5. Primers used in quantitative PCR. [file 12935_2020_1661_MOESM5_ESM.xls]

## Sheet: Tabelle1
Gene	Sequence (5’-3’)
Ascl2 FW	CTACTCGTCGGAGGAAAG
Ascl2 RV	ACTAGACAGCATGGGTAAG
Axin2 FW	CCATGACGGACAGTAGCGTA
Axin2 RV	CTGCGATGCATCTCTCTCTG
Bcl2l15 FW	GCTAACTACGTGACGGGCAT
Bcl2l15 RV	AGCTCTCCAGGTTTTCCCATC
Ctnnb1 FW	AGTCCTTTATGAATGGGAGCAA
Ctnnb1 RV	TCTGAGCCCTAGTCATTGCATA
c-Myc FW	CTAGTGCTGCATGAGGAGACAC
c-Myc RV	GTAGTTGTGCTGGTGAGTGGAG
Fabp6 FW	GGCAAGAAGTTCAAGGCTACC
Fabp6 RV	CGCTCATAGGTCACATCCCC
Gapdh FW	CCAAAGTTGTCATGGATGAC
Gapdh RV	GTGAAGGTCGGTGTGAACGG
Gata4 FW	GCAGCAGCAGTGAAGAGATG
Gata4 RV	GGGACAGCTTCAGAGCAGAC
Muc1 FW	TATGGGCAGCTGGACATCTT
Muc1 RV	TGCTCCTACAAGTTGGCAGA
Reg1 FW	GACCGTTTAACTTGGGCTGA
Reg1 RV	GACGATTCCTTTTGGGATCA
Rpl37 FW	CCAAGGCCTACCACCTTCAG
Rpl37 RV	CAGTCCCGGTAGTGTTTCGT
Scnnb1 FW	CTGCAGTCATCGGAACTTCA
Scnnb1 RV	CCGATGTCCAGGATCAACTT
St6GalNac FW	ACGCCGGAGAGAGATGAGTA
St6GalNac RV	CGCTGGAGAAACTCCACTTC
